# Supplementary material for: Captivity reduces diversity and shifts composition of the Brown Kiwi microbiome
Source: PubMed Central journal article supplement (PMC8268595; doi:10.1186/s42523-021-00109-0), 2021-07-08

# Fungal alpha diversity

Shannon Diversity

2.0

1.5

1.0

0.5

0.0

wild

captive

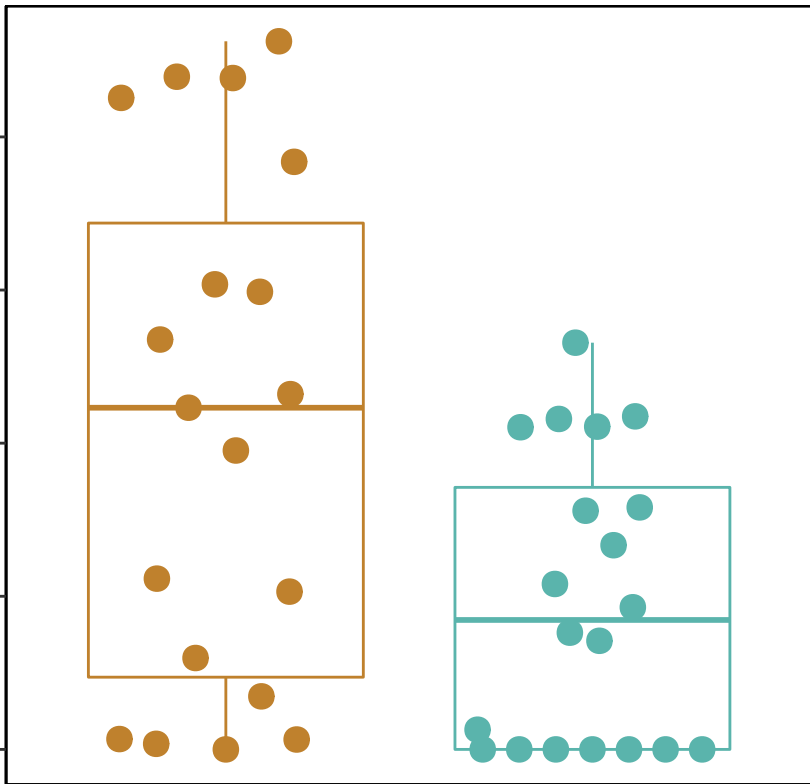

Supplement: 42523_2021_109_MOESM1_ESM.pdf [file 42523_2021_109_MOESM1_ESM.pdf]
