# Supplementary material for: Captivity reduces diversity and shifts composition of the Brown Kiwi microbiome
Source: PubMed Central journal article supplement (PMC8268595; doi:10.1186/s42523-021-00109-0), 2021-07-08
Supplement: 42523_2021_109_MOESM5_ESM.pdf [file 42523_2021_109_MOESM5_ESM.pdf]

**Supplementary Table 1:** Sample collection sites along with the latitude and longitude, captivity status, and sampling size

| <b>Site name</b>       | <b>Latitude</b> | <b>Longitude</b> | <b>Captivity status</b> | <b>Sample size</b> |
|------------------------|-----------------|------------------|-------------------------|--------------------|
| Motuarohia             | -35.23184       | 174.165382       | wild                    | 15                 |
| Moturua                | -35.221929      | 174.192224       | wild                    | 3                  |
| Ponui                  | -36.859947      | 175.184151       | wild                    | 44                 |
| Puketi                 | -35.219586      | 173.732208       | wild                    | 3                  |
| Rakaumangamanga        | -34.937289      | 174.322347       | wild                    | 3                  |
| National Kiwi Hatchery | -38.108791      | 176.221903       | captive                 | 35                 |
| Otorohanga Kiwi House  | -38.179541      | 175.213373       | captive                 | 3                  |
| <b>TOTAL:</b>          |                 |                  |                         | 106                |
