# Supplementary material for: Captivity reduces diversity and shifts composition of the Brown Kiwi microbiome
Source: PubMed Central journal article supplement (PMC8268595; doi:10.1186/s42523-021-00109-0), 2021-07-08
Supplement: 42523_2021_109_MOESM6_ESM.pdf [file 42523_2021_109_MOESM6_ESM.pdf]

**Supplementary Table 2:** Captivity influences bacterial and fungal communities. PERMANOVA results for different factors as predictors of microbial variance. Number of asterisks indicate level of statistical significance (\*\*p < 0.001, \*p < 0.01, \*p < 0.05).

| Taxa     | Factor                                     | PERMANOVA        |         |       |
|----------|--------------------------------------------|------------------|---------|-------|
|          |                                            | r <sup>2</sup>   | p-value |       |
| Bacteria | captivity status (captive or wild)         | 0.07             | 0.001   | ***   |
|          | collection site                            | 0.129            | 0.001   | ***   |
|          | microsite                                  | 0.407            | 0.001   | ***   |
|          | coccidiosis history (positive or negative) | 0.048            | 0.095   |       |
|          | weight                                     | 0.056            | 0.018   | *     |
|          | age                                        | 0.054            | 0.805   |       |
|          | collection date                            | 0.0307           | 0.001   | ***   |
|          | Fungi                                      | captivity status | 0.073   | 0.001 |
|          | collection site                            | 0.183            | 0.001   | ***   |
|          | microsite                                  | 0.301            | 0.023   | *     |
|          | coccidiosis history (positive or negative) | 0.074            | 0.087   |       |
|          | weight                                     | 0.059            | 0.438   |       |
|          | age                                        | 0.205            | 0.4     |       |
|          | collection date                            | 0.03997          | 0.05    | *     |
