# Supplementary material for: Captivity reduces diversity and shifts composition of the Brown Kiwi microbiome
Source: PubMed Central journal article supplement (PMC8268595; doi:10.1186/s42523-021-00109-0), 2021-07-08
Supplement: 42523_2021_109_MOESM7_ESM.pdf [file 42523_2021_109_MOESM7_ESM.pdf]

**Supplementary Table 3:** Clamtest categorizing bacterial and fungal OTUs found in wild and captive kiwi into rare, generalist, wild specialist, and captive specialist.

| <b>Taxa</b> | <b>Category</b>    | <b>Number of OTUs</b> | <b>Proportion</b> |
|-------------|--------------------|-----------------------|-------------------|
| Bacteria    | Generalist         | 58                    | 0.099             |
|             | Wild specialist    | 115                   | 0.197             |
|             | Captive specialist | 102                   | 0.174             |
|             | Rare               | 310                   | 0.53              |
| Fungi       | Generalist         | 0                     | 0                 |
|             | Wild specialist    | 20                    | 0.267             |
|             | Captive specialist | 20                    | 0.267             |
|             | Rare               | 35                    | 0.467             |
