# Supplementary material for: Captivity reduces diversity and shifts composition of the Brown Kiwi microbiome
Source: PubMed Central journal article supplement (PMC8268595; doi:10.1186/s42523-021-00109-0), 2021-07-08
Supplement: 42523_2021_109_MOESM8_ESM.pdf [file 42523_2021_109_MOESM8_ESM.pdf]

**Supplementary Table 4:** Most influential bacterial OTUs distinguishing between wild and captive kiwi samples listed by highest contributing OTU in descending order. 13 bacterial OTUs significantly account for over 70% of the differences between captivity status. OTUs that contributed to less than 1% significance was removed. A p-value was calculated per OTU, in addition to false discovery rate (FDR) adjusted p-value. Mean abundance and standard deviation of each OTU is listed between groups.

| OTU    | Taxonomic level | Taxa                           | Percent total contribution | p-value     | FDR adjusted p-value | Wild mean abundance | Wild standard deviation | Captive mean abundance | Captive standard deviation |
|--------|-----------------|--------------------------------|----------------------------|-------------|----------------------|---------------------|-------------------------|------------------------|----------------------------|
| OTU13  | species         | <i>Clostridium perfringens</i> | 0.053655621                | 0.000136263 | 0.000772157          | 0.081879789         | 0.140470551             | 0.010099208            | 0.051453687                |
| OTU543 | genus           | <i>Bradyrhizobium sp.</i>      | 0.045988157                | 7.76E-06    | 0.000131945          | 0.01718544          | 0.032971642             | 0.115425213            | 0.13622254                 |
| OTU7   | genus           | <i>Sphingomonas sp.</i>        | 0.025692136                | 5.65E-05    | 0.000480146          | 0.007784795         | 0.026203229             | 0.063389749            | 0.103807902                |
| OTU27  | species         | <i>Clostridium baratii</i>     | 0.02001042                 | 0.025545768 | 0.039479823          | 0.023623748         | 0.089747899             | 0.010609481            | 0.05811052                 |
| OTU556 | family          | Ruminococcaceae                | 0.019127641                | 0.000357966 | 0.001217084          | 0.032128992         | 0.053891864             | 0.002083422            | 0.007431549                |
| OTU49  | genus           | <i>Lactobacillus sp.</i>       | 0.016133391                | 0.000724079 | 0.002051556          | 1.91E-05            | 0.000145411             | 0.031783684            | 0.098714368                |
| OTU23  | genus           | <i>Lysinibacillus sp.</i>      | 0.015537456                | 0.009301912 | 0.017570278          | 0.02395652          | 0.066973113             | 0.002835537            | 0.011701813                |
| OTU33  | genus           | <i>Parabacteroides sp.</i>     | 0.014370846                | 0.008179659 | 0.017381775          | 0.019284762         | 0.036641955             | 0.007530305            | 0.021620192                |
| OTU30  | species         | <i>Bacillus nealsonii</i>      | 0.011491221                | 0.010420885 | 0.017715505          | 0.019156704         | 0.048826459             | 0.003954601            | 0.021397974                |
| OTU28  | genus           | <i>Sporosarcina sp.</i>        | 0.011278153                | 0.030220208 | 0.040914297          | 0.016472807         | 0.058383151             | 0.001932169            | 0.009238382                |
| OTU542 | genus           | <i>Enterobacter sp.</i>        | 0.011133118                | 0.002137812 | 0.005191829          | 0.019289558         | 0.059545879             | 0.002913295            | 0.014544268                |
| OTU16  | genus           | <i>Stenotrophomonas sp.</i>    | 0.011076259                | 0.031287404 | 0.040914297          | 0.005396551         | 0.02443941              | 0.021684426            | 0.052999438                |
| OTU570 | family          | Lachnospiraceae                | 0.010361122                | 0.000319224 | 0.001217084          | 0.01756036          | 0.04886533              | 0                      | 0                          |
