# Supplementary material for: Captivity reduces diversity and shifts composition of the Brown Kiwi microbiome
Source: PubMed Central journal article supplement (PMC8268595; doi:10.1186/s42523-021-00109-0), 2021-07-08
Supplement: 42523_2021_109_MOESM10_ESM.pdf [file 42523_2021_109_MOESM10_ESM.pdf]

**Supplementary Table 6:** Clamtest categorizing bacterial and fungal OTUs found in kiwi with and without a history of coccidiosis into rare, generalist, positive specialist, and negative specialist.

| <b>Taxa</b> | <b>Category</b>                 | <b>Number of OTUs</b> | <b>Proportion</b> |
|-------------|---------------------------------|-----------------------|-------------------|
| Bacteria    | Generalist                      | 23                    | 0.092             |
|             | Positive-coccidiosis specialist | 38                    | 0.152             |
|             | Negative-coccidiosis specialist | 42                    | 0.168             |
|             | Rare                            | 147                   | 0.588             |
| Fungi       | Generalist                      | 2                     | 0.057             |
|             | Positive-coccidiosis specialist | 10                    | 0.286             |
|             | Negative-coccidiosis specialist | 8                     | 0.229             |
|             | Rare                            | 15                    | 0.429             |
